# Supplementary material for: Highly efficient production of lactic acid from cellulose using lanthanide triflate catalysts
Source: Royal Society of Chemistry journal article supplement (doi:10.1039/c3gc40836a), 2013-01-01
Supplement: c3gc40836a.pdf [file c3gc40836a.pdf]

## Supporting Information

# **Highly efficient production of lactic acid from cellulose using lanthanide triflate catalysts**

Fen-Fen Wang, Chun-Ling Liu, Wen-Sheng Dong\*

*Key Laboratory of Applied Surface and Colloid Chemistry (SNNU), MOE, School of Chemistry and*

*Chemical Engineering, Shaanxi Normal University, Xi'an, 710062, China*

\* To whom correspondence should be addressed. E-mail: [wsdong@snnu.edu.cn](mailto:wsdong@snnu.edu.cn)

## 1. Materials

D-Fructose (99%) and D-glucose (99%) were purchased from Tianjin Chemical Reagents Company. Formic acid (99%), Levulinic acid (99%), Acetic acid (99%), dihydroxyacetone (99%), microcrystalline cellulose (Cat.: 31069-7, CAS No.: 9004346, particles size of 20 $\mu$ m), La(OTf)<sub>3</sub> (99.99%), Ce(OTf)<sub>3</sub> (99.99%), Pr(OTf)<sub>3</sub> (99.99%), Nd(OTf)<sub>3</sub> (98%), Sm(OTf)<sub>3</sub> (98%), Dy(OTf)<sub>3</sub> (99%), Ho(OTf)<sub>3</sub> (98%), Er(OTf)<sub>3</sub> (99%), Yb(OTf)<sub>3</sub> (99.99%), Lu(OTf)<sub>3</sub> (99.99%), HMF (98%) were all obtained from Sigma-Aldrich. Lactic acid (98%), pyruvaldehyde (98%), glyceraldehyde (99%) and inulin were purchased from Alfa Aesar. D-(+)-Cellubiose was obtained from Sinopharm Chemical Reagent Co. Ltd. (Shanghai, China). Starch was obtained from Beijing Aoboxing bio-tech Co. Ltd. All the other reagents were analytical reagents and used without further purification.

## 2. Experimental Section

All the reactions were carried out in a 35 mL stainless steel autoclave equipped with a mechanical stirrer. In a typical experiment, 0.3 g cellulose, 0.05 g catalyst, and 30 mL water were charged into the reactor. The autoclave was purged three times with pure N<sub>2</sub> and then pressurized to 2.0 MPa with N<sub>2</sub> at room temperature. The reaction mixture was heated to 240 °C and held at the temperature for 30 min under a stirring rate of 600 rpm. After the reaction, the reactor was cooled quickly down to room temperature, and the post-reaction sample was diluted with mobile phase solution before analysis.

Sample analysis was performed on a Shimadzu HPLC LC-20AT system equipped with a RID-10A detector and a Bio-Rad Aminex HPX-87H ion exclusion column (300 × 7.8 mm). 0.005 M H<sub>2</sub>SO<sub>4</sub> was used as the mobile phase that had a flow rate of 0.5 mL/min. The column temperature was 50 °C, and the detector temperature was set at 45 °C. The amount of products was determined by using calibration curves.

The carbon content in various substrates *i.e.* cellulose, inulin, cellulose and starch was analyzed by a Vario EL III CHNS analyzer.

### 3. The cellulose conversion and product yield definitions

The conversion of cellulose and product yields were defined as follows:

Cellulose conversion (wt. %):

$$X = \left( 1 - \frac{\text{mass of unconverted cellulose}}{\text{mass of initial cellulose}} \right) \times 100\%$$

Product yields (C- %):

$$Y_i = \frac{\text{mole of carbon contained in product } i}{\text{mole of carbon contained in initial cellulose}} \times 100\%$$

### 4. Supporting Figures (Figs. S1-S2)

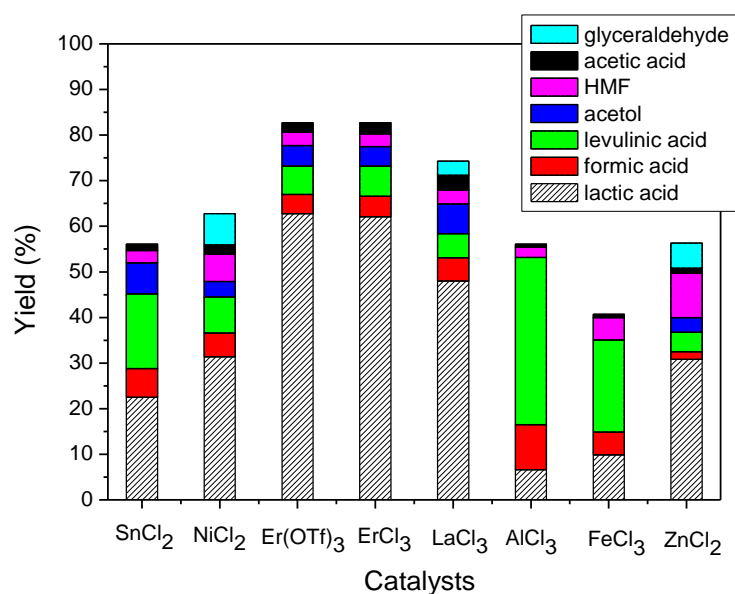

**Fig. S1.** Comparison of catalytic performance of various catalysts in the hydrolysis of cellulose. (Reaction conditions: cellulose 0.3 g, water 30 mL, catalyst 0.05 g, 240 °C, 2 MPa N<sub>2</sub>, 30 min)

**The cellulose was converted completely over all the catalysts.**

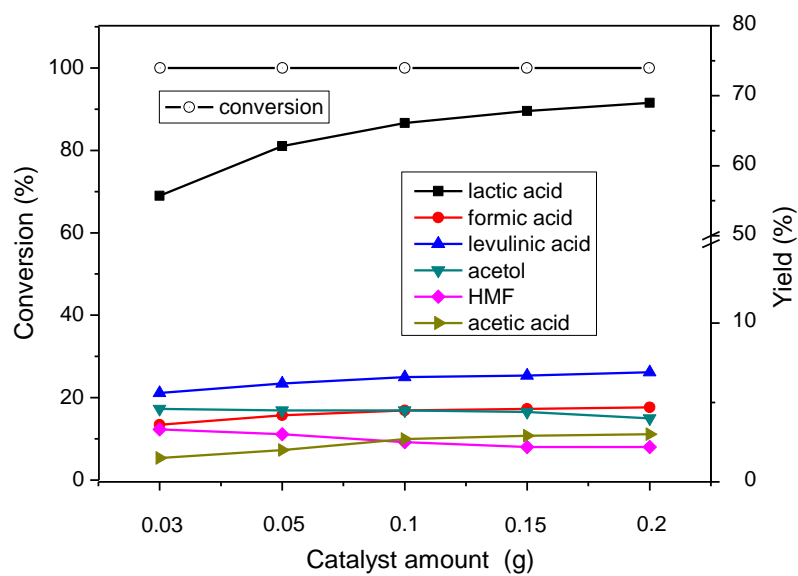

**Fig. S2.** The influence of catalyst amount on the yield of lactic acid. (Reaction conditions: cellulose 0.3 g, water 30 mL, 240 °C, 2 MPa N<sub>2</sub>, 30 min.)
